# Supplementary material for: Association between Selenium Status and Chronic Kidney Disease in Middle-Aged and Older Chinese Based on CHNS Data
Source: MDPI journal article supplement (doi:10.3390/nu14132695), 2022-06-28
Supplement: s1 [file s1]

**Supplementary Table S1.** Logistic regression analysis of CKD status and dietary selenium density (quartile) in adults.

|                                       | <b>Q1</b> | <b>Q2</b>              | <b>Q3</b>              | <b>Q4</b>              | <b>P for Trend</b> |
|---------------------------------------|-----------|------------------------|------------------------|------------------------|--------------------|
| Se intake (µg/1000kcal),<br>mean (SD) | 11.8(2.0) | 16.4(1.1)              | 20.9(1.5)              | 30.3(6.2)              |                    |
| case                                  | 1338      | 1338                   | 1338                   | 1337                   |                    |
| prevalence rate                       | 19.22%    | 18.85%                 | 16.02%                 | 13.95%                 |                    |
| Model 1                               | 1         | 0.98(0.80-1.19)        | <b>0.80(0.66-0.98)</b> | <b>0.68(0.55-0.84)</b> | <b>&lt;0.001</b>   |
| Model 2                               | 1         | 1.01(0.81-1.27)        | 0.86(0.69-1.08)        | <b>0.65(0.51-0.82)</b> | <b>&lt;0.001</b>   |
| Model 3                               | 1         | <b>0.62(0.40-0.97)</b> | <b>0.61(0.38-0.99)</b> | <b>0.36(0.19-0.66)</b> | <b>0.001</b>       |

Model 1 adjusted for none; Model 2 adjusted for age, gender and energy intake; Model 3 adjusted as for model 1 plus protein intake, fat intake, carbohydrate intake, physical activity (MET, hours/week), smoking status (non-smoker, ex-smokers, current smokers), drinking (yes or no), income (tertile), urbanization Index (tertile), education (low, medium, high), and BMI (<18.5, 18.5–23.9, 24.0–27.9, or ≥28 kg/m<sup>2</sup>). Bold: statistically significant.
