# Supplementary material for: Association between Selenium Status and Chronic Kidney Disease in Middle-Aged and Older Chinese Based on CHNS Data
Source: MDPI journal article supplement (doi:10.3390/nu14132695), 2022-06-28
Supplement: s1 [file s1]

**Supplementary Table S2.** Logistic regression analysis of CKD status and dietary selenium (quartile) in adults ( $\geq 45$  years old).

|                                            | Q1         | Q2              | Q3                     | Q4                     | P for Trend      |
|--------------------------------------------|------------|-----------------|------------------------|------------------------|------------------|
| Se intake ( $\mu\text{g/day}$ ), mean (SD) | 21.5(4.82) | 33.1(2.79)      | 43.8(3.70)             | 67.0(13.97)            |                  |
| case                                       | 1350       | 1368            | 1322                   | 1341                   |                  |
| Prevalence                                 | 22.45%     | 20.28%          | 15.72%                 | 9.83%                  |                  |
| Model 1                                    | 1          | 0.88(0.73-1.05) | <b>0.67(0.55-0.81)</b> | <b>0.37(0.30-0.46)</b> | <b>&lt;0.001</b> |
| Model 2                                    | 1          | 1.09(0.89-1.34) | 1.00(0.80-1.25)        | <b>0.63(0.49-0.82)</b> | <b>0.002</b>     |
| Model 3                                    | 1          | 1.05(0.68-1.61) | 0.97(0.61-1.55)        | <b>0.43(0.23-0.80)</b> | <b>0.021</b>     |

Model 1 adjusted for none; Model 2 adjusted for age, gender and energy intake; Model 3 adjusted as for model 1 plus protein intake, fat intake, carbohydrate intake, physical activity (MET, hours/week), smoking status (non-smoker, ex-smokers, current smokers), drinking (yes or no), income (tertile), urbanization Index (tertile), education (low, medium, high), and BMI ( $<18.5$ ,  $18.5\text{--}23.9$ ,  $24.0\text{--}27.9$ , or  $\geq 28$  kg/m<sup>2</sup>). Bold: statistically significant.
